# Supplementary material
Source: MDPI journal article supplement (https://www.mdpi.com/2073-4395/14/3/637)
Supplement: s1 [file s1]

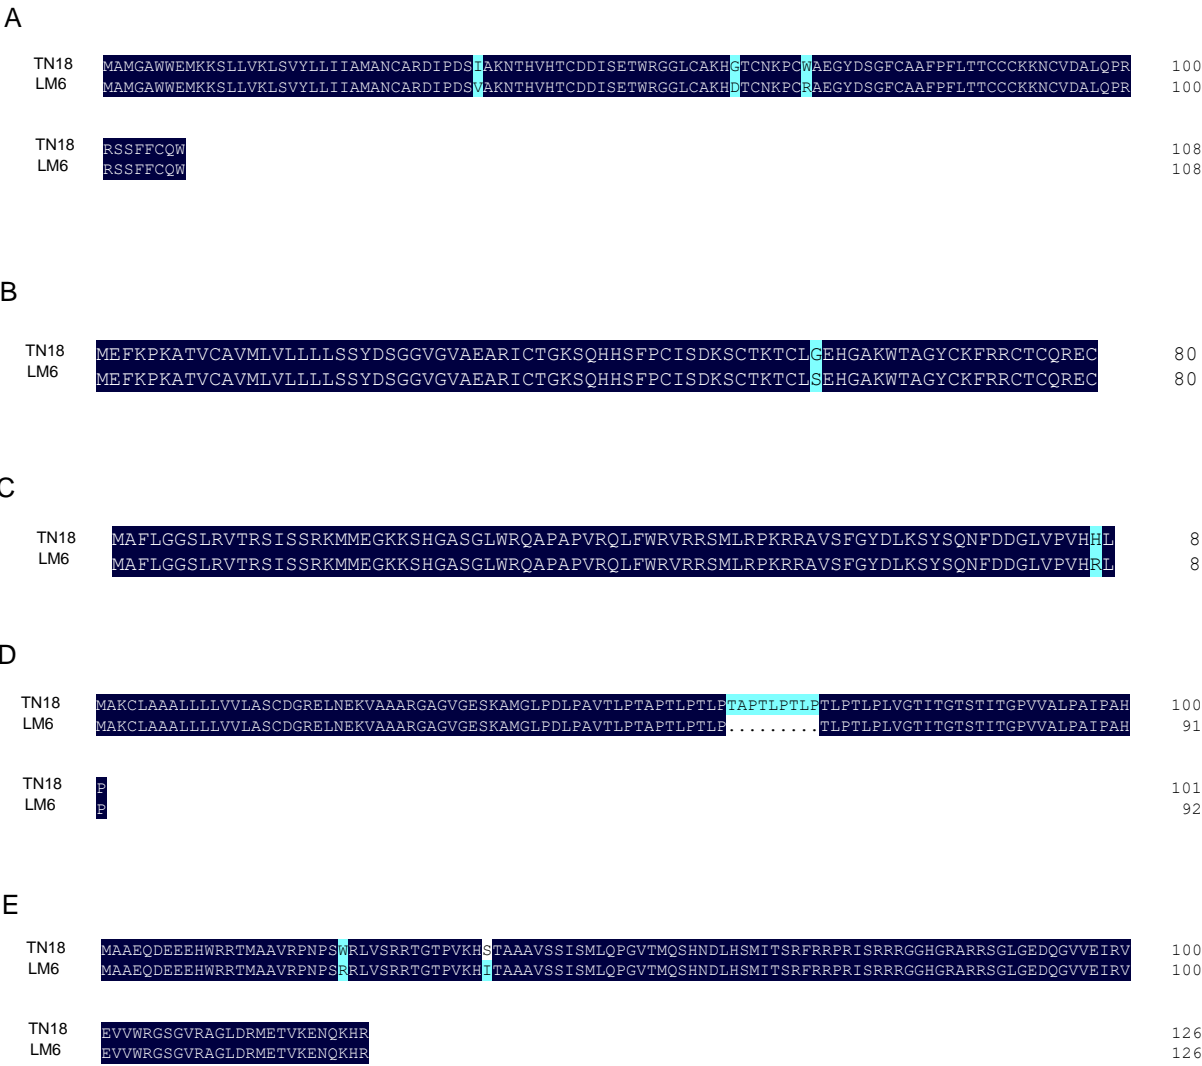

**Figure S3. Difference of amino acid sequences between TN18 and LM6 for candidate genes have been reported to play roles in aphid resistance. A, TraesCS1A02G319900; B, TraesCS5B02G329200; C, TraesCS1B02G397300; D, TraesCS2D02G460800; E, TraesCS6A02G418600LC.**
