# Supplementary material
Source: MDPI journal article supplement (https://www.mdpi.com/2073-4395/14/3/637)
Supplement: s1 [file s1]

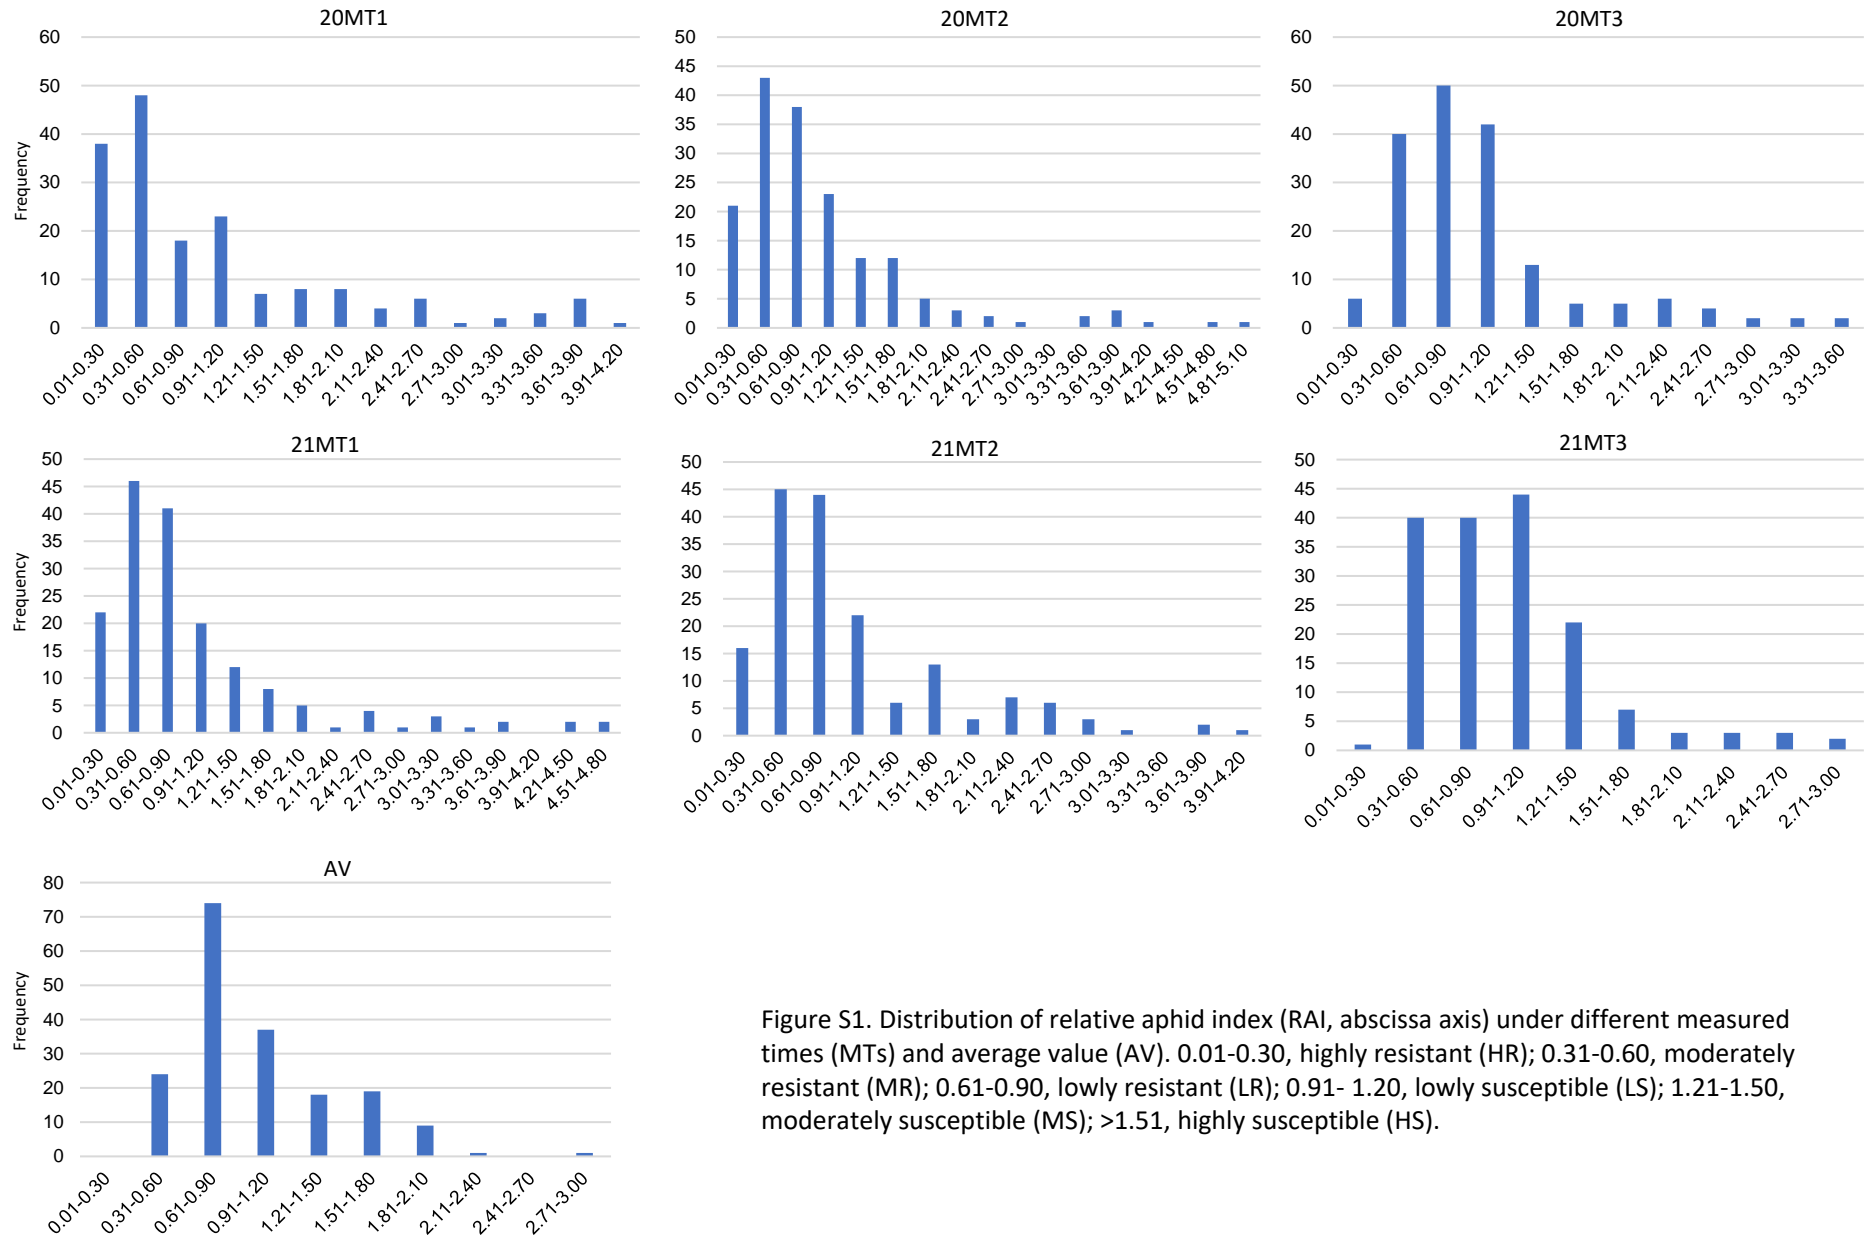

Figure S1. Distribution of relative aphid index (RAI, abscissa axis) under different measured times (MTs) and average value (AV). 0.01-0.30, highly resistant (HR); 0.31-0.60, moderately resistant (MR); 0.61-0.90, lowly resistant (LR); 0.91- 1.20, lowly susceptible (LS); 1.21-1.50, moderately susceptible (MS); >1.51, highly susceptible (HS).
