# Supplementary material
Source: MDPI journal article supplement (https://www.mdpi.com/2073-4395/14/3/637)
Supplement: s1 [file s1]

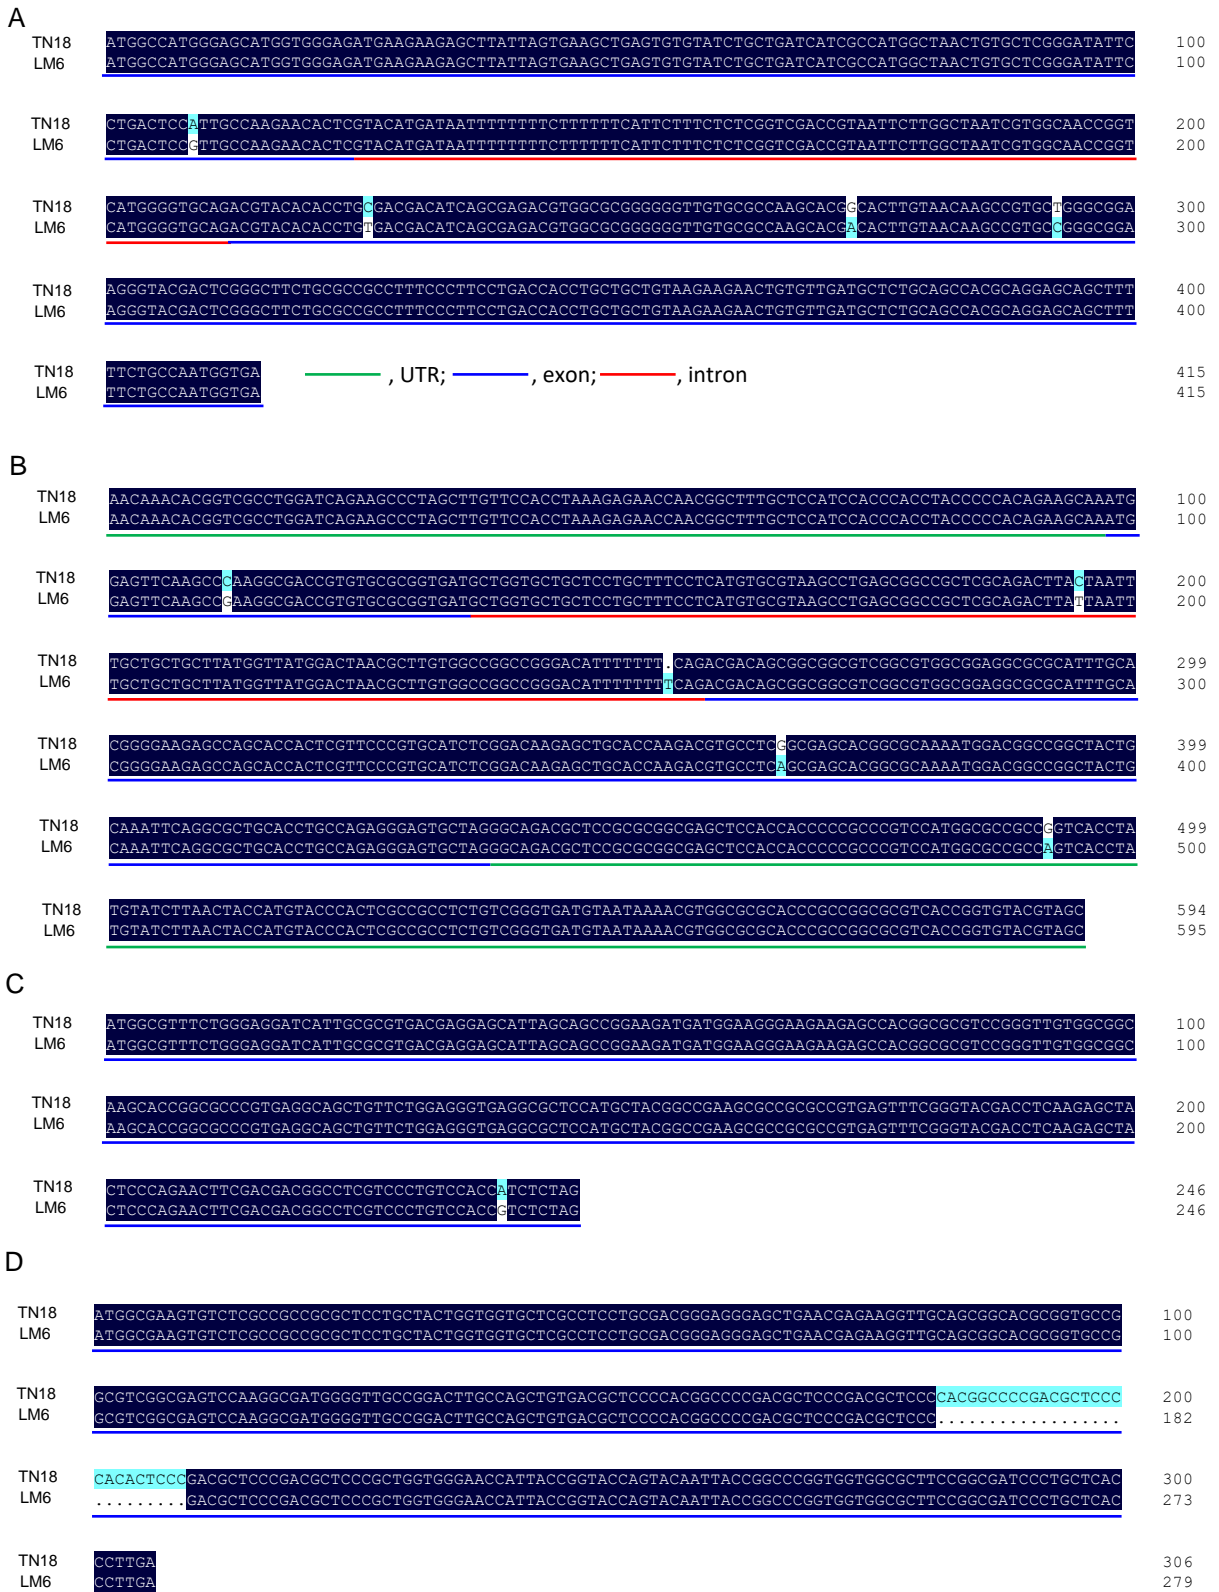

**Figure S2. Difference of DNA sequences between TN18 and LM6 for candidate genes have been reported to play roles in aphid resistance. A, TraesCS1A02G319900; B, TraesCS5B02G329200; C, TraesCS1B02G397300; D, TraesCS2D02G460800; E, TraesCS4A02G015600LC; F, TraesCS6A02G000600; G, TraesCS6A02G418600LC.**

|   |      |                                                                                                         |      |
|---|------|---------------------------------------------------------------------------------------------------------|------|
| E | TN18 | ATGGGCGGAGGAGGTGCGAGCCGTTGCCACACCGCGGATCTGCCGCGGGATGCGGGAGAAGGACGCGTTGCGTGGCCCCGGATCCGGCGAAGCACG        | 100  |
|   | LM6  | ATGGGCGGAGGAGGTGCGAGCCGTTGCCACACCGCGGATCTGCCGCGGGATGCGGGAGAAGGACGCGTTGCGTGGCCCCGGATCCGGCGAAGCACG        | 100  |
|   | TN18 | TGCGCAAGAGGCGGCCAACGGGGCGCGGGGCACAACTCCAGATCCGTGCGGGCCGAGCAGAGCGTGAAGCTAGGAAGCGGCCATATGCTTTGGGTGGCCG    | 200  |
|   | LM6  | TGCGCAAGAGGCGGCCAACGGGGCGCGGGGCACAACTCCAGATCCGTGCGGGCCGAGCAGAGCGTGAAGCTAGGAAGCGGCCATATGCTTTGGGTGGCCG    | 200  |
|   | TN18 | CCTTCGGTGCAGCCGCGGCAATGGCATGTTGTAGTTTGGCGGCTAGGTTTGGGTGCCCCGGTGTACCCCTGCAAGTGACACAGAAGTGAGCGACCAG       | 300  |
|   | LM6  | CCTTCGGTGCAGCCGCGGCAATGGCATGTTGTAGTTTGGCGGCTAGGTTTGGGTGCCCCGGTGTACCCCTGCAAGTGACACAGAAGTGAGCGACCAG       | 300  |
|   | TN18 | GAACCAGAAGATGCCGGCAGTCTGGTAACATATGGATTTCCTCTCTCTCTAGTAGATAATCCAGATTGTTTTGTCTTTCGTGAGCTTTTGTGCTGATGT     | 400  |
|   | LM6  | GAACCAGAAGATGCCGGCAGTCTGGTAACATATGGATTTCCTCTCTCTCTAGTAGATAATCCAGATTGTTTTGTCTTTCGTGAGCTTTTGTGCTGATGT     | 400  |
|   | TN18 | GTGATCCAAAATTTGGACGCATATCAATTGTTTGAACCATGTGCTAGCTAGAGAAGGATCTGGTGTAGTTTGTGTTAATCAAGGATTAATCAATGATATACCA | 500  |
|   | LM6  | GTGATCCAAAATTTGGACGCATATCAATTGTTTGAACCATGTGCTAGCTAGAGAAGGATCTGGTGTAGTTTGTGTTAATCAAGGATTAATCAATGATATACCA | 500  |
|   | TN18 | GTTTACATGTACTTTGGAAGTTTTCATCATCTGTACTTGCATATTGGAGTGAAGGTGCTAAAGTTTAGCAATTCTACATTTTATTCTTTAATCTGTAA      | 600  |
|   | LM6  | GTTTACATGTACTTTGGAAGTTTTCATCATCTGTACTTGCATATTGGAGTGAAGGTGCTAAAGTTTAGCAATTCTACATTTTATTCTTTAATCTGTAA      | 600  |
|   | TN18 | GTTGTGTGAAAGTTGTCAATGATTACAATTAGAATCGAAGCAATACTACTTTTACCCCTCCATTAAAAAATGCTACTTGTACTGACTTTGTCAAGCA       | 700  |
|   | LM6  | GTTGTGTGAAAGTTGTCAATGATTACAATTAGAATCGAAGCAATACTACTTTTACCCCTCCATTAAAAAATGCTACTTGTACTGACTTTGTCAAGCA       | 700  |
|   | TN18 | TTATAGTGTATAGATAAGTGTATATCTGCAGATTGTTATGTAGATGGCTTGAACCTTCTTCTGGGTAATTGAAAAGGACGAACAACCTAACTCTCTCT      | 800  |
|   | LM6  | TTATAGTGTATAGATAAGTGTATATCTGCAGATTGTTATGTAGATGGCTTGAACCTTCTTCTGGGTAATTGAAAAGGACGAACAACCTAACTCTCTCT      | 800  |
|   | TN18 | ATAGATGAACACTACTATTTACTGTCTCACCCGAGCTAGTATTATTGTAGCAGGCATTGCATTGTCCAAATGGATATGTGGAATTTGCTAGTAATCAGG     | 900  |
|   | LM6  | ATAGATGAACACTACTATTTACTGTCTCACCCGAGCTAGTATTATTGTAGCAGGCATTGCATTGTCCAAATGGATATGTGGAATTTGCTAGTAATCAGG     | 900  |
|   | TN18 | TCTTGACTACTCTGGATAAAATAGGAGTGACATTTGCGAGTTGTGGCATGGCCTGCACCTAACGTTTACAAGGCTGATGTCTCTTTTAAAAAACCATGCAT   | 1000 |
|   | LM6  | TCTTGACTACTCTGGATAAAATAGGAGTGACATTTGCGAGTTGTGGCATGGCCTGCACCTAACGTTTACAAGGCTGATGTCTCTTTTAAAAAACCATGCAT   | 1000 |
|   | TN18 | TCAGTTGTTGTTTGCTTTGACCTGATCTGATAGCAAGTGTTTTTATGTCATCTTTAGTGAAGAAGTTTTTGAGTGGCTGTCTGTTCCGAGCTACCGGAAG    | 1100 |
|   | LM6  | TCAGTTGTTGTTTGCTTTGACCTGATCTGATAGCAAGTGTTTTTATGTCATCTTTAGTGAAGAAGTTTTTGAGTGGCTGTCTGTTCCGAGCTACCGGAAG    | 1100 |
|   | TN18 | AACAGGCTAGCTGCCAACGCACAAAGACCAAGCGGAGAATGAAGGTAGAAGCGAGACAGAATACCCGGGAAGGTCGACCTCAAGACTTACTTGAGCCA      | 1200 |
|   | LM6  | AACAGGCTAGCTGCCAACGCACAAAGACCAAGCGGAGAATGAAGGTAGAAGCGAGACAGAATACCCGGGAAGGTCGACCTCAAGACTTACTTGAGCCA      | 1200 |
|   | TN18 | CGAGAATATTTCCCTTGAGTTCGAGAGGATGTTCAAGTTGCTTCATCACTTGTCTCAGTTCTGCTCCTCTTCCAAAGCACCTAGCATTATTGATTATGGT    | 1300 |
|   | LM6  | CGAGAATATTTCCCTTGAGTTCGAGAGGATGTTCAAGTTGCTTCATCACTTGTCTCAGTTCTGCTCCTCTTCCAAAGCACCTAGCATTATTGATTATGGT    | 1300 |
|   | TN18 | TGGTTCTGATCACCCCTAATTTTTTTCATTATCACTTCCTTATAGATTTCTCATTTTTTCTCTGAGCACACTGCCTATAAGTAGTCTGGCCCATTCAGT     | 1400 |
|   | LM6  | TGGTTCTGATCACCCCTAATTTTTTTCATTATCACTTCCTTATAGATTTCTCATTTTTTCTCTGAGCACACTGCCTATAAGTAGTCTGGCCCATTCAGT     | 1400 |
|   | TN18 | GAGCAGCGGCAGGGGAGGCTGGCAGAACCTCATCAGCCCCATTGCTTTGCAACCAGGATGGACGCTGCCTCAAAAAGATCTGGTATTTTTTCAGTCCA      | 1500 |
|   | LM6  | GAGCAGCGGCAGGGGAGGCTGGCAGAACCTCATCAGCCCCATTGCTTTGCAACCAGGATGGACGCTGCCTCAAAAAGATCTGGTATTTTTTCAGTCCA      | 1500 |
|   | TN18 | TTTTCCATTTTATCCTTTTATAATTTGTTAATTTAATTTTGGCTCCCTGATTGGTCTTCTCTCTGTGCACAGTTTGTCTCAACAGGGAATCGAGGACAG     | 1600 |
|   | LM6  | TTTTCCATTTTATCCTTTTATAATTTGTTAATTTAATTTTGGCTCCCTGATTGGTCTTCTCTCTGTGCACAGTTTGTCTCAACAGGGAATCGAGGACAG     | 1600 |
|   | TN18 | CAAGGACCATTGAAGCCCGAGGTGTTTGAATTTGGACAGTTCAATCTCTACTTTTCTCCTCCAATGATTAGGTTGTTCCCGTTTTTCTATTGAAATTTGA    | 1700 |
|   | LM6  | CAAGGACCATTGAAGCCCGAGGTGTTTGAATTTGGACAGTTCAATCTCTACTTTTCTCCTCCAATGATTAGGTTGTTCCCGTTTTTCTATTGAAATTTGA    | 1700 |
|   | TN18 | AGTCGAATAAAATTTTGTATATATATCTATACGAATGAAATATGCACTATGTTGTAGTTGCTGTCTTGATGGGCACCATTTTTTAAGTTTGTATGGG       | 1800 |
|   | LM6  | AGTCGAATAAAATTTTGTATATATATCTATACGAATGAAATATGCACTATGTTGTAGTTGCTGTCTTGATGGGCACCATTTTTTAAGTTTGTATGGG       | 1800 |
|   | TN18 | CCTCAGAAAAATTCAGGACCGGCCCTGTATATATGTAGTGTATTTTCCCTTGTGTTTGTAGATGTAAGTTACCAAAATATAGGTTAATATCAGCTGTA      | 1900 |
|   | LM6  | CCTCAGAAAAATTCAGGACCGGCCCTGTATATATGTAGTGTATTTTCCCTTGTGTTTGTAGATGTAAGTTACCAAAATATAGGTTAATATCAGCTGTA      | 1900 |
|   | TN18 | GTAAATGTGAAGTTAGGAATGAGTTTTTCCTTATGCATTTTCTAGTTTGTGAAGCAGCTTTTGGTAACCTGGTTCAGTTAGTCTGTTGATGTTCAACTTT    | 2000 |
|   | LM6  | GTAAATGTGAAGTTAGGAATGAGTTTTTCCTTATGCATTTTCTAGTTTGTGAAGCAGCTTTTGGTAACCTGGTTCAGTTAGTCTGTTGATGTTCAACTTT    | 2000 |
|   | TN18 | TATACAGTTTCTTCCATTATATCAATTAATAGCACGCTGCCTCTGTAATAGTATTAAGTACTCTATTCTAGCCTTACTTATAGAAGTTTGTGTAACCTA     | 2100 |
|   | LM6  | TATACAGTTTCTTCCATTATATCAATTAATAGCACGCTGCCTCTGTAATAGTATTAAGTACTCTATTCTAGCCTTACTTATAGAAGTTTGTGTAACCTA     | 2100 |
|   | TN18 | TAGGTATTTTTTGTCTTCTCAAAATAGATTTATATTTCAAGGAAGCAGATTCAAGTAAAAATCATAGTATTACAGCAGAACATGTTCTTGCAAAACA       | 2200 |
|   | LM6  | TAGGTATTTTTTGTCTTCTCAAAATAGATTTATATTTCAAGGAAGCAGATTCAAGTAAAAATCATAGTATTACAGCAGAACATGTTCTTGCAAAACA       | 2200 |
|   | TN18 | TCAACATGAAAGAGGTTTGTGATGGTTCTAGGTCGATGCTCTTAG                                                           | 2247 |
|   | LM6  | TCAACATGAAAGAGGTTTGTGATGGTTCTAGGTCGATGCTCTTAG                                                           | 2247 |

Figure S2.Continued

|   |      |                                                                                                      |      |
|---|------|------------------------------------------------------------------------------------------------------|------|
| F | TN18 | TGGACTCTCTCTCAAAATTGAGTCTTTGCAAGTCCAGCCGGCGGATCCAAGTTCCACTCCCACCTTCCCCAACGCTCCACGCTGCTCGCCGGCCGG     | 100  |
|   | LM6  | TGGACTCTCTCTCTCAAAATTGAGTCTTTGCAAGTCCAGCCGGCGGATCCAAGTTCCACTCCCACCTTCCCCAACGCTCCACGCTGCTCGCCGGCCGG   | 100  |
|   | TN18 | CCGGCCATGGCGGCGATGCCAGCGCCCGATCCCTCCTGCTGCTCCTCCTCGCCACCCCTTCTCCTGCTCCCGCTCGCGCGCGCGCGGCTCAG         | 200  |
|   | LM6  | CCGGCCATGGCGGCGATGCCAGCGCCCGATCCCTCCTGCTGCTCCTCCTCGCCACCCCTTCTCCTGCTCCCGCTCGCGCGCGCGCGGCTCAG         | 200  |
|   | TN18 | TCCCCACCTCCAACCCGGACATCGACCTCGAATACCTCATCAAGAAGCGCGGCTCGACGACGCCACCCCAACGACCCGAGGACGGCGCTCCGGACTT    | 300  |
|   | LM6  | TCCCCACCTCCAACCCGGACATCGACCTCGAATACCTCATCAAGAAGCGCGGCTCGACGACGCCACCCCAACGACCCGAGGACGGCGCTCCGGACTT    | 300  |
|   | TN18 | CCCCGACCTCGACGCCGACTACGAAGACGAGGACCTCTTCGGCGACGACGACGGCCGGAGGAGGACTCTCCCACCCCTCGCGGCCGACGAGGCCAC     | 400  |
|   | LM6  | CCCCGACCTCGACGCCGACTACGAAGACGAGGACCTCTTCGGCGACGACGACGGCCGGAGGAGGACTCTCCCACCCCTCGCGGCCGACGAGGCCAC     | 400  |
|   | TN18 | GTGCTCCTCCTCACCGCCGCAACTTCACCGCGTCTCGCGGCCCGCCGCCACGTGATGGTTCAGTTCTACGCGCCCTGGTGGGCCACTGCCGCGCG      | 500  |
|   | LM6  | GTGCTCCTCCTCACCGCCGCAACTTCACCGCGTCTCGCGGCCCGCCGCCACGTGATGGTTCAGTTCTACGCGCCCTGGTGGGCCACTGCCGCGCG      | 500  |
|   | TN18 | TGGCCCCCACTACGCCCGCCGCGCGCCCTCGCCGAGCAGGGCGTCGACGTGGCGCTGGCCAAGGTGGACGCTACCGAGGAGCAGACCTGGCGCA       | 600  |
|   | LM6  | TGGCCCCCACTACGCCCGCCGCGCGCCCTCGCCGAGCAGGGCGTCGACGTGGCGCTGGCCAAGGTGGACGCTACCGAGGAGCAGACCTGGCGCA       | 600  |
|   | TN18 | GGCGCAGCAGTGCAGGGTACCCACCCCTCTTCTTTCATCGACGGCGTGCCAGGGACTACTCGGCAGAGGACCAAGTGAGCAATTTCTGCAGAT        | 700  |
|   | LM6  | GGCGCAGCAGTGCAGGGTACCCACCCCTCTTCTTTCATCGACGGCGTGCCAGGGACTACTCGGCAGAGGACCAAGTGAGCAATTTCTGCAGAT        | 700  |
|   | TN18 | CCCCAATTCCTCCTGCTCCGGCTCCGACGTGCTGCTAAGAAATTTTGTCTTGCTGCAGGGACGCCATTGTCGCTTGGATCAGCAAGAAGCTGGGCC     | 800  |
|   | LM6  | CCCCAATTCCTCCTGCTCCGGCTCCGACGTGCTGCTAAGAAATTTTGTCTTGCTGCAGGGACGCCATTGTCGCTTGGATCAGCAAGAAGCTGGGCC     | 800  |
|   | TN18 | TGCGGTGCAGAACCTCACCGCGTCGACGACGCCGAGAAGGTGCTACCGGGCAGCAGCTGGCCGTGCTCGCTTCTTCGACCACTCTCGGTACGCAAT     | 900  |
|   | LM6  | TGCGGTGCAGAACCTCACCGCGTCGACGACGCCGAGAAGGTGCTACCGGGCAGCAGCTGGCCGTGCTCGCTTCTTCGACCACTCTCGGTACGCAAT     | 900  |
|   | TN18 | GCGCCTTCTCCAGTGGCAGCAAAGTCAACCAAAACCAAAATTTCTTCAATTCCAACCATGTTACCCAGATTGACCCAAGAATACAGTTGTTGAATCACA  | 1000 |
|   | LM6  | GCGCCTTCTCCAGTGGCAGCAAAGTCAACCAAAACCAAAATTTCTTCAATTCCAACCATGTTACCCAGATTGACCCAAGAATACAGTTGTTGAATCACA  | 1000 |
|   | TN18 | GCCAAACAGCTCATGTGGCCATCCATGTTACCCCAAATTAGTTACCCACAAATACAATGCACCTGTTCTTCTCAGTTCCCTGAATATTCTGATGACTCAC | 1100 |
|   | LM6  | GCCAAACAGCTCATGTGGCCATCCATGTTACCCCAAATTAGTTACCCACAAATACAATGCACCTGTTCTTCTCAGTTCCCTGAATATTCTGATGACTCAC | 1100 |
|   | TN18 | TGGATGAAATGTCAACCTGCATGTTCTGTTACCATGTGCTCAGAACAAATCTGAGTTCAACTCGTATGTTTAGCTATCGGTACGCACTCATGTGGCCATG | 1200 |
|   | LM6  | TGGATGAAATGTCAACCTGCATGTTCTGTTACCATGTGCTCAGAACAAATCTGAGTTCAACTCGTATGTTTAGCTATCGGTACGCACTCATGTGGCCATG | 1200 |
|   | TN18 | TTTGTTACCCCAAATTTAGTTGACCACAAATACAATGCACCTGTATTTCTGAATGCCCTTGTCTTTTGCTTGCTCACTACTATGTACTAGTAGTAGATA  | 1300 |
|   | LM6  | TTTGTTACCCCAAATTTAGTTGACCACAAATACAATGCACCTGTATTTCTGAATGCCCTTGTCTTTTGCTTGCTCACTACTATGTACTAGTAGTAGATA  | 1300 |
|   | TN18 | AAATGTCAACCTACATGTTCTGTTACCATGTGCTGAGAACGGCTCCCGGATGCGCTCATATGTTTAGCTATCGGACACTTGCATATAACATTGTGATAAA | 1400 |
|   | LM6  | AAATGTCAACCTACATGTTCTGTTACCATGTGCTGAGAACGGCTCCCGGATGCGCTCATATGTTTAGCTATCGGACACTTGCATATAACATTGTGATAAA | 1400 |
|   | TN18 | ATCCTTAATTACTCTATCATTGAATGTTTtagggTGCTCATAGTGATGAGCTTGCTGCTGCTTCATGATCCAAATTACATTTTCGTCTGTTCCATGATTC | 1500 |
|   | LM6  | ATCCTTAATTACTCTATCATTGAATGTTTtagggTGCTCATAGTGATGAGCTTGCTGCTGCTTCATGATCCAAATTACATTTTCGTCTGTTCCATGATTC | 1500 |
|   | TN18 | CTTTGCTCACTACTAGATAAAATGTCAACCTGCATGATCTGTTACCATGTACTGAAAACAAATCCGAGATGCGCTTGATTTTGGCTATTCTAATTCTG   | 1600 |
|   | LM6  | CTTTGCTCACTACTAGATAAAATGTCAACCTGCATGATCTGTTACCATGTACTGAAAACAAATCCGAGATGCGCTTGATTTTGGCTATTCTAATTCTG   | 1600 |
|   | TN18 | CGCTGCATATATATACACTATGGTGATAAATCATTAATTAATCTCTTGTCATCAAAATATATAGGGTGCTCACAGTGATGAGCTTGCTGCTGCTTCAAG  | 1700 |
|   | LM6  | CGCTGCATATATATACACTATGGTGATAAATCATTAATTAATCTCTTGTCATCAAAATATATAGGGTGCTCACAGTGATGAGCTTGCTGCTGCTTCAAG  | 1700 |
|   | TN18 | GCTGGAAGATACCATCAGCTTTTATCAGACCACGACCCCGATGTAGCCAAAGCTTTTCCACATTGACCCGGAAGCAAAGCGCCGTCAGTAGTCTGCTC   | 1800 |
|   | LM6  | GCTGGAAGATACCATCAGCTTTTATCAGACCACGACCCCGATGTAGCCAAAGCTTTTCCACATTGACCCGGAAGCAAAGCGCCGTCAGTAGTCTGCTC   | 1800 |
|   | TN18 | AAGAAAGAGGAGGAGAAGCTGACCGTATTTGGTATCTTCACTCCGAGTTGCTTTGGCTTTACGCGCAGCCCTTTCCTTTCCATTTCTTTACACGTTTTG  | 1900 |
|   | LM6  | AAGAAAGAGGAGGAGAAGCTGACCGTATTTGGTATCTTCACTCCGAGTTGCTTTGGCTTTACGCGCAGCCCTTTCCTTTCCATTTCTTTACACGTTTTG  | 1900 |
|   | TN18 | GTTTGACCGTTAAATTGGATAAATGTACCGTGTGCCATGCAGATGGCGAGTTTCAGAGCGTCTGCGATTGCCGAGTTTGTGTCGGCCAAACAAATCCCA  | 2000 |
|   | LM6  | GTTTGACCGTTAAATTGGATAAATGTACCGTGTGCCATGCAGATGGCGAGTTTCAGAGCGTCTGCGATTGCCGAGTTTGTGTCGGCCAAACAAATCCCA  | 2000 |
|   | TN18 | TTGATCACCACCTTCACAGGAGACCGCCCTGCGATTTTCGATAATCCAATCAAGAAGCAAGTATGCCATGCTGCTGCCATGGGGTTTTATTTCAT      | 2100 |
|   | LM6  | TTGATCACCACCTTCACAGGAGACCGCCCTGCGATTTTCGATAATCCAATCAAGAAGCAAGTATGCCATGCTGCTGCCATGGGGTTTTATTTCAT      | 2100 |
|   | TN18 | CATACTGTCGACCATGTATTACTCCTTCGCTGACCTGCTGCTTCTAATTTTGAAATTAGATTCTGCTATTGCTGTTGCGAAGGAGTCTTCAAATTT     | 2200 |
|   | LM6  | CATACTGTCGACCATGTATTACTCCTTCGCTGACCTGCTGCTTCTAATTTTGAAATTAGATTCTGCTATTGCTGTTGCGAAGGAGTCTTCAAATTT     | 2200 |

Figure S2.Continued

|      |                                                                                                       |      |
|------|-------------------------------------------------------------------------------------------------------|------|
| TN18 | CTGCCCATCATCAAGGAAACAGCAAAATCATTTCAAGGGGAAGGTATTTTTTCTCTGTTGATCGGACCAGTGTTCATGAACTTTTCTCTGTCATGTTCT   | 2300 |
| LM6  | CTGCCCATCATTAAGGAAACAGCAAAATCATTTCAAGGGGAAGGTATTTTTTCTCTGTTGATCGGACCAGTGTTCATGAACTTTTCTCTGTCATGTTCT   | 2300 |
| TN18 | CACGTTTTATACTCAAATCCAAGCCATCACTTATTTCTTTCTAATAACTTGTGTGTTTGTGAGGTGGAGTCTCACTAAGCACIGATGTGGCCTGTGTC    | 2400 |
| LM6  | CACGTTTTATACTCAAATCCAAGCCATCACTTATTTCTTTCTAATAACTTGTGTGTTTGTGAGGTGGAGTCTCACTAAGCACTGATGTGGCCTGTGTC    | 2400 |
| TN18 | TCAAATGCAGCTTTTATTGTCTTTGTGGAGCGTGACAATGAGGAAGTTGGTGAACCTGTTGCCAATTACTTTGGAATTACTGGACAAGAGACCACGGTA   | 2500 |
| LM6  | TCAAATGCAGCTTTTATTGTCTTTGTGGAGCGTGACAATGAGGAAGTTGGTGAACCTGTTGCCAATTACTTTGGAATTACTGGACAAGAGACCACGGTA   | 2500 |
| TN18 | ATGGCTCTTAATTTTGTGGCCATGTTTATCTATCTGTGATTATTGTACAGAAGAACTATAGAATGCAATAATTGACTTTGATTTAATTTGTCTGCT      | 2600 |
| LM6  | ATGGCTCTTAATTTTGTGGCCATGTTTATCTATCTGTGATTATTGTACAGAAGAACTATAGAATGCAATAATTGACTTTGATTTAATTTGTCTGCT      | 2600 |
| TN18 | CTTTCTGTTTTGTACATCCTGATTGATTACTTTGCAGGTTCTTGCTTACACTGGGAATGAAGACGCTAAGAAGTTTTTCTTCAGTGGTGAATATCACT    | 2700 |
| LM6  | CTTTCTGTTTTGTACATCCTGATTGATTACTTTGCAGGTTCTTGCTTACACTGGGAATGAAGACGCTAAGAAGTTTTTCTTCAGTGGTGAATATCACT    | 2700 |
| TN18 | GGACACCATGAAGGTAATTGCTTAAATATTTTTTGCAAATTCAGTACTCCCTCCGCTCGAAATACTTGCTCTAGAAATGGTGTATCTAGACTTATTT     | 2800 |
| LM6  | GGACACCATGAAGGTAATTGCTTAAATATTTTTTGCAAATTCAGTACTCCCTCCGCTCGAAATACTTGCTCTAGAAATGGTGTATCTAGACTTATTT     | 2800 |
| TN18 | TAGTTATAGATACATCCATTTTATCTGTTTCTAGGACAAGTATTTTCGGACGGAGGGAGTACCAGATTGGAAGTAAATCATAAGAATGTGGTCAACAGT   | 2900 |
| LM6  | TAGTTATAGATACATCCATTTTATCTGTTTCTAGGACAAGTATTTTCGGACGGAGGGAGTACCAGATTGGAAGTAAATCATAAGAATGTGGTCAACAGT   | 2900 |
| TN18 | TGCAAGAGAATATAGTATGTTAGCAATATATAAGCTGACGAACGTGTTTTGCTTTTCGTTATTTGATGATTTATGCTGTTCTTTTTATACCGCGGTAT    | 3000 |
| LM6  | TGCAAGAGAATATAGTATGTTAGCAATATATAAGCTGACGAACGTGTTTTGCTTTTCGTTATTTGATGATTTATGCTGTTCTTTTTATACCGCGGTAT    | 3000 |
| TN18 | ATTTCTGCTTATATCGTGCTATATGTTGCTTCAGAACTTTCATGTCCATGTATATTTTCTCATCTTTTCGCAAACTAGCACTTGCTCTCATCTTGCCTG   | 3100 |
| LM6  | ATTTCTGCTTATATCGTGCTATATGTTGCTTCAGAACTTTCATGTCCATGTATATTTTCTCATCTTTTCGCAAACTAGCACTTGCTCTCATCTTGCCTG   | 3100 |
| TN18 | TTCATCATTGCTGAATGCTGATGTTGAGGCTCTGCTAATGTTATTGGGTAGGATGGTATCAAGTACCATTGTTCAAGAAAGTACAGTGTCTCTTATAAAA  | 3200 |
| LM6  | TTCATCATTGCTGAATGCTGATGTTGAGGCTCTGCTAATGTTATTGGGTAGGATGGTATCAAGTACCATTGTTCAAGAAAGTACAGTGTCTCTTATAAAA  | 3200 |
| TN18 | ATCTTTCTACTTCTTGTTAATACCCAGGAATTTGCTCAAGATTTCTGGAGGACAAGCTCACACCATCCTACAAGTCTGACCCAGTACCTGAATCTGTGA   | 3300 |
| LM6  | ATCTTTCTACTTCTTGTTAATACCCAGGAATTTGCTCAAGATTTCTGGAGGACAAGCTCACACCATCCTACAAGTCTGACCCAGTACCTGAATCTGTGA   | 3300 |
| TN18 | GTGGAGAAGAATTATCTGATATCTCTTTTCCCTGTCATTATTACACGACAATGAGGCATTCTTTGTGTTCCCGTGCAGAATGATGAGGATGTCAAAGTT   | 3400 |
| LM6  | GTGGAGAAGAATTATCTGATATCTCTTTTCCCTGTCATTATTACACGACAATGAGGCATTCTTTGTGTTCCCGTGCAGAATGATGAGGATGTCAAAGTT   | 3400 |
| TN18 | GTTGTTGGCAAGAGTCTAGATCAAATAGTTCTGGATGAATCAAAGATGTCCTTTTGGAGGTATGTTCAAGTTCTGCCAGGTAGTATTTGAGAAGATAAA   | 3500 |
| LM6  | GTTGTTGGCAAGAGTCTAGATCAAATAGTTCTGGATGAATCAAAGATGTCCTTTTGGAGGTATGTTCAAGTTCTGCCAGGTAGTATTTGAGAAGATAAA   | 3500 |
| TN18 | AAATGTGTGTTGCCATAACGCCGTGCCATTTTGGACGCAAGTATATGCACCATGGTGTGGGCATTGTCAGTCACTGGAGCCTATCTACAACAAGCTGGC   | 3600 |
| LM6  | AAATGTGTGTTGCCATAACGCCGTGCCATTTTGGACGCAAGTATATGCACCATGGTGTGGGCATTGTCAGTCACTGGAGCCTATCTACAACAAGCTGGC   | 3600 |
| TN18 | CAAGTATCTCCGTGGCATCGACTCCCTTGTAATAGCCAAAATGGACGGCACAACAATGAGCATCCTCGTGCCAAGGTCTGTGTCGCTATCTTTTGACTT   | 3700 |
| LM6  | CAAGTATCTCCGTGGCATCGACTCCCTTGTAATAGCCAAAATGGACGGCACAACAATGAGCATCCTCGTGCCAAGGTCTGTGTCGCTATCTTTTGACTT   | 3700 |
| TN18 | CTTCAAACCTGGATATTACTTGTCTAGACTAGTCTGAGTGCCGGGCCATCAACAGTCATAGAACCCTACATACATTTTATATGAAACAATACTAGTTATAA | 3800 |
| LM6  | CTTCAAACCTGGATATTACTTGTCTAGACTAGTCTGAGTGCCGGGCCATCAACAGTCATAGAACCCTACATACATTTTATATGAAACAATACTAGTTATAA | 3800 |
| TN18 | AACGTGTAGAAGTTATTTCAACACTTTCCTCACTTGAATGTGCAGTTGTACTTGTATGTTGTCACAGAAAGTATAGGTCCATTATCTGTCTGCTGCCAT   | 3900 |
| LM6  | AACGTGTAGAAGTTATTTCAACACTTTCCTCACTTGAATGTGCAGTTGTACTTGTATGTTGTCACAGAAAGTATAGGTCCATTATCTGTCTGCTGCCAT   | 3900 |
| TN18 | CTTACTCCCTCCGTCCCAAAAATAGTGTGCTGACTTAGCACAACTTTGGTGTGAGCGACACTTATTTTGGCAGCGAGGGAGTATCAGTATATGATAAA    | 4000 |
| LM6  | CTTACTCCCTCCGTCCCAAAAATAGTGTGCTGACTTAGCACAACTTTGGTGTGAGCGACACTTATTTTGGCAGCGAGGGAGTATCAGTATATGATAAA    | 4000 |
| TN18 | ATATTTATTTCTGCACCTATTTATCCATACGCTACAGTGTGATGGTACAGTTTGTCTAACGGGCTAAAGAGTGTGATGGCTATTGTGAGATTTGAATCAC  | 4100 |
| LM6  | ATATTTATTTCTGCACCTATTTATCCATACGCTACAGTGTGATGGTACAGTTTGTCTAACGGGCTAAAGAGTGTGATGGCTATTGTGAGATTTGAATCAC  | 4100 |
| TN18 | ATGCTGTTAGGAGTTAGAGACAGGTTAATTTGGGAAATAGGTGCTATTTGGCAAGACAGATTTGGCTAGGAAGATAGAGACAAGAGCTCGAGTCTTATGG  | 4200 |
| LM6  | ATGCTGTTAGGAGTTAGAGACAGGTTAATTTGGGAAATAGGTGCTATTTGGCAAGACAGATTTGGCTAGGAAGATAGAGACAAGAGCTCGAGTCTTATGG  | 4200 |
| TN18 | GACAAGTTGAGTTGAGCCTCAGAAACGAACACTGTGCCAGGTTTGTGTAAGGATGGCGCCATGTCCCCCGGTTATCTCGCTATAGTTGGAGGCCCATAA   | 4300 |
| LM6  | GACAAGTTGAGTTGAGCCTCAGAAACGAACACTGTGCCAGGTTTGTGTAAGGATGGCGCCATGTCCCCCGGTTATCTCGCTATAGTTGGAGGCCCATAA   | 4300 |

Figure S2.Continued

|      |                                                                                                       |      |
|------|-------------------------------------------------------------------------------------------------------|------|
| TN18 | CATCTTGAATAGTGCAACAGTATTTTGTATGCATATATAGTATTAATGCGCATGGGGAAGCTCGCGCTCTTCTATTTTGGTGTGGCACTATGATTA      | 4400 |
| LM6  | CATCTTGAATAGTGCAACAGTATTTTGTATGCATATATAGTATTAATGCGCATGGGGAAGCTCGCGCTCTTCTATTTTGGTGTGGCACTATGATTA      | 4400 |
| TN18 | TGACTGTTACATTTTGAAGCTGCCTTTCATTTAGCTCTGTTTTCCTTTTAATTATCTTTCCTGACTTGACACTTTGCTTCCGTGTACAGCCTGATGGATT  | 4500 |
| LM6  | TGACTGTTACATTTTGAAGCTGCCTTTCATTTAGCTCTGTTTTCCTTTTAATTATCTTTCCTGACTTGACACTTTGCTTCCGTGTACAGCCTGATGGATT  | 4500 |
| TN18 | CCCCACAATACTCTTCTATCCAGCTGGGAAGAAAAGCTTTGAGCCTGTAAGTGCTTACATATGTGATGTTTCACTTCTTGCTTTGCAACACATCTCTCTT  | 4600 |
| LM6  | CCCCACAATACTCTTCTATCCAGCTGGGAAGAAAAGCTTTGAGCCTGTAAGTGCTTACATATGTGATGTTTCACTTCTTGCTTTGCAACACATCTCTCTT  | 4600 |
| TN18 | ACTACGATTTTGGCATTTTGTCTTTCAGTTGGTAGCAATCGCGTTAACCTCGCCCTCTCCTTAATAGGGCTTCTCAGCACAGCTATCGTTATGCTTTGCT  | 4700 |
| LM6  | ACTACGATTTTGGCATTTTGTCTTTCAGTTGGTAGCAATCGCGTTAACCTCGCCCTCTCCTTAATAGGGCTTCTCAGCACAGCTATCGTTATGCTTTGCT  | 4700 |
| TN18 | AGAGCTGTCTCTAGACTCCTTAAACTCAGCTAAAACATCCATGTGATTAGCTGCTGATTGTGCATGCTTATATCCCTGCAAAATTTTGTGTATATGCCT   | 4800 |
| LM6  | AGAGCTGTCTCTAGACTCCTTAAACTCAGCTAAAACATCCATGTGATTAGCTGCTGATTGTGCATGCTTATATCCCTGCAAAATTTTGTGTATATGCCT   | 4800 |
| TN18 | TTGTAGGTGCTTTACGATTGGTCATGCCCTGTGATTTTGGGTAAATGGTGGTAGATTCACTGGACAGCTAGCTAAACTCATGGGTGGAGCTTGAATGGTGC | 4900 |
| LM6  | TTGTAGGTGCTTTACGATTGGTCATGCCCTGTGATTTTGGGTAAATGGTGGTAGATTCACTGGACAGCTAGCTAAACTCATGGGTGGAGCTTGAATGGTGC | 4900 |
| TN18 | TATGGGATTTTAGTCAACTGGTAACCTGATATACTAACTCAATTTGCTGGCTGAACCTTGTAGATAACTTTTGAGGGGGACCGGACGGTGGTGGAGATG   | 5000 |
| LM6  | TATGGGATTTTAGTCAACTGGTAACCTGATATACTAACTCAATTTGCTGGCTGAACCTTGTAGATAACTTTTGAGGGGGACCGGACGGTGGTGGAGATG   | 5000 |
| TN18 | TACAAGTTCCTCAAGAAGCATGCCGCCATCCCATTTCAAGCTGAAGCGCCGGACTCGTCAGCGGCACAGACCGATGACTCAAGCTCGACGGCCGAGGGCG  | 5100 |
| LM6  | TACAAGTTCCTCAAGAAGCATGCCGCCATCCCATTTCAAGCTGAAGCGCCGGACTCGTCAGCGGCACAGACCGATGACTCAAGCTCGACGGCCGAGGGCG  | 5100 |
| TN18 | AGAAGAGCTCCGGTTCGAACCCGAAGGACGAGTTGTAGGGGGATTACTTACGCCATTGACAACAAGTACGCGGTGCTGCTGTCAAAGCAGGAGGTGGAG   | 5200 |
| LM6  | AGAAGAGCTCCGGTTCGAACCCGAAGGACGAGTTGTAGGGGGATTACTTACGCCATTGACAACAAGTACGCGGTGCTGCTGTCAAAGCAGGAGGTGGAG   | 5200 |
| TN18 | AACAAATAGCTAGGTATCAACTCGGGCCGCTGGAAGTGTATGTTGTGAATACGAATATTAGAATAGAATCCATTAGAAGCAAGAAGTCTTTGCTTACAT   | 5300 |
| LM6  | AACAAATAGCTAGGTATCAACTCGGGCCGCTGGAAGTGTATGTTGTGAATACGAATATTAGAATAGAATCCATTAGAAGCAAGAAGTCTTTGCTTACAT   | 5300 |
| TN18 | CTTGTTCCGTATCTTCAAACCTAGATATATTCTACTCAAAATCTGAGAGAACCAAGGGTAGCCACAGGTAGCTGGCTACATACATACAGTAAGAAAGTA   | 5400 |
| LM6  | CTTGTTCCGTATCTTCAAACCTAGATATATTCTACTCAAAATCTGAGAGAACCAAGGGTAGCCACAGGTAGCTGGCTACATACATACAGTAAGAAAGTA   | 5400 |
| TN18 | CGCCCCCTGTAAACGCTCTGTAAAAGTTTACAGAGGGAGACGTGGAGTTTCTACACCCAGGAGCACAAATGCTCTGGTGTGAACAGT               | 5489 |
| LM6  | CGCCCCCTGTAAACGCTCTGTAAAAGTTTACAGAGGGAGACGTGGAGTTTCTACACCCAGGAGCACAAATGCTCTGGTGTGAACAGT               | 5489 |

G

|      |                                                                                                      |     |
|------|------------------------------------------------------------------------------------------------------|-----|
| TN18 | ATGGCTGCTGAACAGGATGAAGAGGAGCACTGGAGGAGGACCATGGCAGCGGTGAGACCCAACCCGTCGTGGCGCCTAGTGAGCAGGCGCACGGGCACAC | 100 |
| LM6  | ATGGCTGCTGAACAGGATGAAGAGGAGCACTGGAGGAGGACCATGGCAGCGGTGAGACCCAACCCGTCGTGGCGCCTAGTGAGCAGGCGCACGGGCACAC | 100 |
| TN18 | CAGTAAGACACATCCACAGCGCGGCGCGTGTCTCCATCTCGATGCTTCAGCGGGCGCTCACCATGCAGTCACACAAGACCTGCACTCCATGATAACCTC  | 200 |
| LM6  | CAGTAAGACACATCCACAGCGCGGCGCGTGTCTCCATCTCGATGCTTCAGCGGGCGCTCACCATGCAGTCACACAAGACCTGCACTCCATGATAACCTC  | 200 |
| TN18 | TCGATTCCGCGCCCCCGAATCTCACGGCGTCGAGGTGGCCATGGGAGGGCTCGCCGGAGTGGTTTAGGAGAGGATCAGGGGGTTGTGGAGATCAGGGTG  | 300 |
| LM6  | TCGATTCCGCGCCCCCGAATCTCACGGCGTCGAGGTGGCCATGGGAGGGCTCGCCGGAGTGGTTTAGGAGAGGATCAGGGGGTTGTGGAGATCAGGGTG  | 300 |
| TN18 | GAGGTGGTTTGGAGAGGTTCCGGGGGTGAGGCGGGTCTGGATAGGATGGAGACCGTGAAAGGAAACAAAAACATAGGTGATTTCCTCCCTTTTTTCCAT  | 400 |
| LM6  | GAGGTGGTTTGGAGAGGTTCCGGGGGTGAGGCGGGTCTGGATAGGATGGAGACCGTGAAAGGAAACAAAAACATAGGTGATTTCCTCCCTTTTTTCCAT  | 400 |
| TN18 | GCGGAAGAGGAGGTGGAGTCAAACGTTTTATTGGAGGAAAATCGGTGGGGGAGGTGATCGATGCGAGGGTTGCGTGCGAACGAACGAACGACGTACGG   | 500 |
| LM6  | GCGGAAGAGGAGGTGGAGTCAAACGTTTTATTGGAGGAAAATCGGTGGGGGAGGTGATCGATGCGAGGGTTGCGTGCGAACGAACGAACGACGTACGG   | 500 |
| TN18 | ACTCCTTCATTAGNNNNNNNNNNNNNNNNNNNNNNNNNNNNNNNNNNNNNNNNNNNNNNNNNNNNNNNNNNNNNNNNNNNNNNNNNNNNNNNNNNNNNN  | 600 |
| LM6  | ACTCCTTCATTAGNNNNNNNNNNNNNNNNNNNNNNNNNNNNNNNNNNNNNNNNNNNNNNNNNNNNNNNNNNNNNNNNNNNNNNNNNNNNNNNNNNNNNN  | 600 |
| TN18 | NNNNNNNNNNNNNNNNNNNNNNNNNNNNNNNNNNNNNNNNNNNNNNNNNNNNNNNNNNNNNNNNNNNNNNNNNNNNNNNNNNNNNNNNNNNNNN       | 700 |
| LM6  | NNNNNNNNNNNNNNNNNNNNNNNNNNNNNNNNNNNNNNNNNNNNNNNNNNNNNNNNNNNNNNNNNNNNNNNNNNNNNNNNNNNNNNNNNNNNNN       | 700 |
| TN18 | CAGGGGGTTGTGGAGATCAGGGTGGAGGTGGTTTGGAGAGGTTTCGGGGGTGAGGGCGGGTCTGGATAGGATGGAGACCGTGAAAGAAAACAAAAACATA | 800 |
| LM6  | CAGGGGGTTGTGGAGATCAGGGTGGAGGTGGTTTGGAGAGGTTTCGGGGGTGAGGGCGGGTCTGGATAGGATGGAGACCGTGAAAGAAAACAAAAACATA | 800 |
| TN18 | GGTGA                                                                                                | 805 |
| LM6  | GGTGA                                                                                                | 805 |

Figure S2.Continued
