# Supplementary material
Source: MDPI journal article supplement (https://www.mdpi.com/2073-4395/14/3/637)
Supplement: s1 [file s1]

|   |      |                                                                                                       |      |
|---|------|-------------------------------------------------------------------------------------------------------|------|
| A | TN18 | TTGTTCCCTTTCCAGATGCTTTAGAACAGACAAGTGATGATGTTGGAATAAGAGGTTGCTTGATTCCCTTTTATGCCATAGTTCATAGTACAACACACAC  | 100  |
|   | LM6  | TTGTTCCCTTTCCAGATGCTTTAGAACAGACAAGTGATGATGTTGGAATAAGAGGTTGCTTGATTCCCTTTTATGCCATAGTTCATAGTACAACACACAC  | 100  |
|   | TN18 | GTACTGCAGCCTCTTAAATTATAAGATAGGAACCACTAGGGATCAGACTACTGATCCCTAGCGTTTCATCATACTAGTCCATAGCTGTAGGATTAGTGGC  | 200  |
|   | LM6  | GTACTGCAGCCTCTTAAATTATAAGATAGGAACCACTAGGGATCAGACTACTGATCCCTAGCGTTTCATCATACTAGTCCATAGCTGTAGGATTAGTGGC  | 200  |
|   | TN18 | ACACAAGCCGTTAGATCCTGTGCGGGAAGGACGCATGTTGTTAGCTAGATTCTTTGGTAACGTCCTCCTTTTATTACGATGCTTCTATAACTGCTCTCA   | 300  |
|   | LM6  | ACACAAGCCGTTAGATCCTGTGCGGGAAGGACGCATGTTGTTAGCTAGATTCTTTGGTAACGTCCTCCTTTTATTACGATGCTTCTATAACTGCTCTCA   | 300  |
|   | TN18 | TCCTAGTATTACGATTACCATGCTTCTTCCGGAACCTGCTCTCGTCCCTAGTAGCCAGTTAATTTATACG                                | 400  |
|   | LM6  | TCCTAGTATTACGATTACCATGCTTCTTCCGGAACCTGCTCTCGTCCCTAGTAGCCAGTTAATTTATACG                                | 400  |
|   | TN18 | GACTGCTTCTGCTTCCATCGCTCAATTAAGCAAGGATGCTCATATGATACTAGTAAAATTTACATACCTTTTTATTTTTCAGAAGAAACATATTATTGATT | 500  |
|   | LM6  | GACTGCTTCTGCTTCCATCGCTCAATTAAGCAAGGATGCTCATATGATACTAGTAAAATTTACATACCTTTTTATTTTTCAGAAGAAACATATTATTGATT | 500  |
|   | TN18 | TTATGGATCCTAGTAATTTAT                                                                                 | 600  |
|   | LM6  | TTATGGATCCTAGTAATTTAT                                                                                 | 600  |
|   | TN18 | TAATGACACAATTTGCTTCTGTGCAATCCAACAAAAA                                                                 | 700  |
|   | LM6  | TAATGACACAATTTGCTTCTGTGCAATCCAACAAAAA                                                                 | 700  |
|   | TN18 | TATGGGAAAACATGAATCCCATG                                                                               | 800  |
|   | LM6  | TATGGGAAAACATGAATCCCATG                                                                               | 800  |
|   | TN18 | TTGCTTATAACGAAACATAAGTTAGATTATATACTTCGTCCATTCATACAACTTTGCATTTCATTTTTTTCTTATTTTCTGTTCATGTATGGATTCT     | 900  |
|   | LM6  | TTGCTTATAACGAAACATAAGTTAGATTATATACTTCGTCCATTCATACAACTTTGCATTTCATTTTTTTCTTATTTTCTGTTCATGTATGGATTCT     | 900  |
|   | TN18 | TACAGAGTTTCAGACGCTGTTGGGTGCTTAAGTAATAT                                                                | 1000 |
|   | LM6  | TACAGAGTTTCAGACGCTGTTGGGTGCTTAAGTAATAT                                                                | 1000 |
|   | TN18 | TTAGTATTTTTGCTCATACAGGAAACCTCACTCAGTTCGATTAATTCAGTCCAATGGTGGTATCTGGAAGACATGGAAGTGACAATTTTCTGTATGTG    | 1100 |
|   | LM6  | TTAGTATTTTTGCTCATACAGGAAACCTCACTCAGTTCGATTAATTCAGTCCAATGGTGGTATCTGGAAGACATGGAAGTGACAATTTTCTGTATGTG    | 1100 |
|   | TN18 | CTCTCATATTTATATCCATTTTTTTTATGCTTTCTTGAGGAAAAAGACTCTAGACCGGAGAGGGATTACTCCCTATCAGGGCGAAGCTACAAGTTAGTC   | 1200 |
|   | LM6  | CTCTCATATTTATATCCATTTTTTTTATGCTTTCTTGAGGAAAAAGACTCTAGACCGGAGAGGGATTACTCCCTATCAGGGCGAAGCTACAAGTTAGTC   | 1200 |
|   | TN18 | TGTGGGTGAGTTGATCCCGAGCTTTTATAGAAAATAAGCCTAAAAACACTGTTCACTGTTTATACTGAAAAAAA                            | 1300 |
|   | LM6  | TGTGGGTGAGTTGATCCCGAGCTTTTATAGAAAATAAGCCTAAAAACACTGTTCACTGTTTATACTGAAAAAAA                            | 1298 |
|   | TN18 | ACCCACAGATACTTTAGGCTGGCCTCGCGCTGCTCCCTATAGGTCTCTTCCAAGTTTATTTACCTGTTATTTTCCCTTTTACATTCTTGACCGGAG      | 1400 |
|   | LM6  | ACCCACAGATACTTTAGGCTGGCCTCGCGCTGCTCCCTATAGGTCTCTTCCAAGTTTATTTACCTGTTATTTTCCCTTTTACATTCTTGACCGGAG      | 1398 |
|   | TN18 | TGACTAATATGTGCCATGGTATACGTGACAACTATTGCCTATCCATATGATGCATGTTTTTTTTGAAACAGACATTCTTATATTAGTCACTCCAAAA     | 1500 |
|   | LM6  | TGACTAATATGTGCCATGGTATACGTGACAACTATTGCCTATCCATATGATGCATGTTTTTTTTGAAACAGACATTCTTATATTAGTCACTCCAAAA     | 1498 |
|   | TN18 | AAAACATATATACACATAAAACTGAAAAGAAAAGGTGGAGTTTATATAGCGGATGCCAAAAATTACATAGACACACCTATGGTGACAATAAATGTATCT   | 1600 |
|   | LM6  | AAAACATATATACACATAAAACTGAAAAGAAAAGGTGGAGTTTATATAGCGGATGCCAAAAATTACATAGACACACCTATGGTGACAATAAATGTATCT   | 1596 |
|   | TN18 | TTTCCAATTGCTCTATGCACGACTTCTTTTTTCTAATTACAAGCTTATCCATGTAGCTCTCTAATTTAAAGTTGAAAATAAAACAAAAACAGCATACA    | 1700 |
|   | LM6  | TTTCCAATTGCTCTATGCACGACTTCTTTTTTCTAATTACAAGCTTATCCATGTAGCTCTCTAATTTAAAGTTGAAAATAAAACAAAAACAGCATACA    | 1696 |
|   | TN18 | TAAACATGACATATCTACAGGCGCGGCATG                                                                        | 1800 |
|   | LM6  | TAAACATGACATATCTACAGGCGCGGCATG                                                                        | 1796 |
|   | TN18 | AAATTTGGCTATGACTAGGTGTGATTTGAGAAAGCTAATGTTGTAGCCATAAGGAAATTTATTAGATATAATCGAGGAGAGCTATGGTGGCATAAATCCAA | 1900 |
|   | LM6  | AAATTTGGCTATGACTAGGTGTGATTTGAGAAAGCTAATGTTGTAGCCATAAGGAAATTTATTAGATATAATCGAGGAGAGCTATGGTGGCATAAATCCAA | 1896 |
|   | TN18 | CGCATTATTGCACCTCTGAACCCCTAGAAAATACATGAATCACATCTTGGCTATATATATGCGGATATTGGAAGGGGGAAGAACCAACCAACAAAGCAT   | 2000 |
|   | LM6  | CGCATTATTGCACCTCTGAACCCCTAGAAAATACATGAATCACATCTTGGCTATATATATGCGGATATTGGAAGGGGGAAGAACCAACCAACAAAGCAT   | 1996 |
|   | TN18 | AGGC                                                                                                  | 2004 |
|   | LM6  | AGGC                                                                                                  | 2000 |

**Figure S4. Difference of promoter region (-2000 bp from the start site of the 5'UTR) between TN18 and LM6 for candidate genes have been reported to play roles in aphid resistance. A, TraesCS1A02G319900; B, TraesCS5B02G329200; C, TraesCS1B02G397300; D, TraesCS6A02G418600LC.**

|   |      |                                                                                                           |      |
|---|------|-----------------------------------------------------------------------------------------------------------|------|
| B | TN18 | GTACGTTTTATTCTTATTATTATACCTTAGCCCGCCCATGCATGCATCGATCGAGATGCAGCAGCTGGCTGGCTAGTGATGACACGGACATACATACGAC      | 100  |
|   | LM6  | GTACGTTTTATTCTTATTATTATACCTTAGCCCGCCCATGCATGCATCGATCGAGATGCAGCAGCTGGCTGGCTAGTGATGACACGGACATACATACGAC      | 100  |
|   | TN18 | ATACGTACGTAGAAAGGGGCACACACATTCAAGTAGGTACACAGACGTATGGTTCCATGGGCTAGCTAGCTGACGTACGGCGAGGGCCAGCTAGCCGTAG      | 200  |
|   | LM6  | ATACGTACGTAGAAAGGGGCACACACATTCAAGTAGGTACACAGACGTATGGTTCCATGGGCTAGCTAGCTGACGTACGGCGAGGGCCAGCTAGCCGTAG      | 200  |
|   | TN18 | CACATATGATCAGCACTGCCTGATGCACCTTGCACCGGCGGAAGGGCCGCTCGCAGTTGCCGCCGCCAGCCTTCTTGCTGGCAGACTTGCGCGCAGTTTC      | 300  |
|   | LM6  | CACATATGATCAGCACTGCCTGATGCACCTTGCACCGGCGGAAGGGCCGCTCGCAGTTGCCGCCGCCAGCCTTCTTGCTGGCAGACTTGCGCGCAGTTTC      | 300  |
|   | TN18 | TTATTGGACATGCACGGCCCCCTTGAACCGGGCGCTGCGCCGCCGGCAGATCTTCGCCCTCCGCCCCCGGCACCGCCGCCCTCCTCTGCATCCATTTCATGTTTC | 400  |
|   | LM6  | TTATTGGACATGCACGGCCCCCTTGAACCGGGCGCTGCGCCGCCGGCAGATCTTCGCCCTCCGCCCCCGGCACCGCCGCCCTCCTCTGCATCCATTTCATGTTTC | 400  |
|   | TN18 | GCCACACGTCAACATGCATGTATAATGACATAACATATGTGCTACTATCCAACTGAATATCTGATGAAAAATGTCGACGGAGCAAAATAATACACACTTA      | 500  |
|   | LM6  | GCCACACGTCAACATGCATGTATAATGACATAACATATGTGCTACTATCCAACTGAATATCTGATGAAAAATGTCGACGGAGCAAAATAATACACACTTA      | 500  |
|   | TN18 | CGTGCATGAGGAGGAGAAGCAGACACAAAACCACCTGCGTCGCCACCTTCTTGGTCCACATTGTGAACGGCCGGGCTGGGAGCGACCTAAACTCTGCTT       | 600  |
|   | LM6  | CGTGCATGAGGAGGAGAAGCAGACACAAAACCACCTGCGTCGCCACCTTCTTGGTCCACATTGTGAACGGCCGGGCTGGGAGCGACCTAAACTCTGCTT       | 600  |
|   | TN18 | GCGCTACGTACTGGCTTTGCTACTGGTGGAGTTGTGTGATGTGGGTGGCTATACGCTCATCGGTGATAGCATTATATAACATGAGCTCGGAGCCGGTCGG      | 700  |
|   | LM6  | GCGCTACGTACTGGCTTTGCTACTGGTGGAGTTGTGTGATGTGGGTGGCTATACGCTCATCGGTGATAGCATTATATAACATGAGCTCGGAGCCGGTCGG      | 700  |
|   | TN18 | GTCCGTTGTGCATGGACTCGAAGCAGCATGCGCATCGTGGCGTGGGGGCGCGCAATGACTGGCCGCGTGGCGTGCCGCATGATGGATCGCGTTTCACGTGG     | 800  |
|   | LM6  | GTCCGTTGTGCATGGACTCGAAGCAGCATGCGCATCGTGGCGTGGGGGCGCGCAATGACTGGCCGCGTGGCGTGCCGCATGATGGATCGCGTTTCACGTGG     | 800  |
|   | TN18 | CGGGCTCGGTGCATGCGGGGCCACGTATTTTCCACAGATGCGGTGGTGCCTTTTGGCTGCAGCGGTGCATGCATGCCAGATTGCCAGGGCACAGTAGAG       | 900  |
|   | LM6  | CGGGCTCGGTGCATGCGGGGCCACGTATTTTCCACAGATGCGGTGGTGCCTTTTGGCTGCAGCGGTGCATGCATGCCAGATTGCCAGGGCACAGTAGAG       | 900  |
|   | TN18 | CGCGCAGGGTAGTCGGCAGCTATGTAGGTACCCACGACAGATGGTGCCTTTTGGCTGCAGCGGTGCATGCATGCAAGATTGCCAGGGCACCGGAGAGCG       | 1000 |
|   | LM6  | CGCGCAGGGTAGTCGGCAGCTATGTAGGTACCCACGACAGATGGTGCCTTTTGGCTGCAGCGGTGCATGCATGCAAGATTGCCAGGGCACCGGAGAGCG       | 1000 |
|   | TN18 | CGCAGGGTGGTTCGGCAGGCACTAGGTTCACACGAGACAATGGTGCCTTTTGGCTGCACCGGTGCATGCATGCCAGGGCACGGGAGAGCGCGCAGGGTAGT     | 1100 |
|   | LM6  | CGCAGGGTGGTTCGGCAGGCACTAGGTTCACACGAGACAATGGTGCCTTTTGGCTGCACCGGTGCATGCATGCCAGGGCACGGGAGAGCGCGCAGGGTAGT     | 1100 |
|   | TN18 | CGGCACGTAGGTAGGTACCCACGAGACGGTGGTTCGGGGGTAGTCGGGGGTAGAGCTCGATTGCCAGAGGAGCGCGCAGGGTAGTCGGCGGGTAGAGC        | 1200 |
|   | LM6  | CGGCACGTAGGTAGGTACCCACGAGACGGTGGTTCGGGGGTAGTCGGGGGTAGAGCTCGATTGCCAGAGGAGCGCGCAGGGTAGTCGGCGGGTAGAGC        | 1200 |
|   | TN18 | CAGATTTCCAGGGCACGAGAGAGCGCGCAGGTTAGTCGGCGGGTAGTTAGGACCGCCAGGTAGTAGATCGGCGGGCTGCTTGGGTTTCGTGGCTCCTCC       | 1300 |
|   | LM6  | CAGATTTCCAGGGCACGAGAGAGCGCGCAGGTTAGTCGGCGGGTAGTTAGGACCGCCAGGTAGTAGATCGGCGGGCTGCTTGGGTTTCGTGGCTCCTCC       | 1300 |
|   | TN18 | ACAGGCGGCGTGGGCTTGATGACAGGACAGCGCGTGGCGAGCTCTGCCCTACCGCCACCGGTGGGACACCGATCGGTTCGGCCGATGCATCAGGTGGG        | 1400 |
|   | LM6  | ACAGGCGGCGTGGGCTTGATGACAGGACAGCGCGTGGCGAGCTCTGCCCTACCGCCACCGGTGGGACACCGATCGGTTCGGCCGATGCATCAGGTGGG        | 1400 |
|   | TN18 | GGTCAAGGGCAGGCACTCGTGTAGACGATGGAAGATCGTCTCGGCCCTCTCGGGCCAGTATCTCAGTCAAATGGCTTGCCTTTTTCATGTAAAAACACATG     | 1500 |
|   | LM6  | GGTCAAGGGCAGGCACTCGTGTAGACGATGGAAGATCGTCTCGGCCCTCTCGGGCCAGTATCTCAGTCAAATGGCTTGCCTTTTTCATGTAAAAACACATG     | 1500 |
|   | TN18 | TAATTTTCGTTCACTGCTTTACCTTATTATCAGATTTTGAAGAGACTGCTTTTGGCGGAGATTATTAGGGAATTGGAGGAATACGCATGCATGGCTCATGC     | 1600 |
|   | LM6  | TAATTTTCGTTCACTGCTTTACCTTATTATCAGATTTTGAAGAGACTGCTTTTGGCGGAGATTATTAGGGAATTGGAGGAATACGCATGCATGGCTCATGC     | 1600 |
|   | TN18 | CAAGTTTTTGTCTGGCTTGAATGCGGGATAGGTGTTGGGACTTGAACGGCGAGCGGCGCAGCCTTGCAGACCTCCACGCTGAATCCTTTTTCGACCA         | 1700 |
|   | LM6  | CAAGTTTTTGTCTGGCTTGAATGCGGGATAGGTGTTGGGACTTGAACGGCGAGCGGCGCAGCCTTGCAGACCTCCACGCTGAATCCTTTTTCGACCA         | 1700 |
|   | TN18 | GGCATGAACTCGAGAGTTTTGAGATCATTGATCGTCTCCTAGTCCAGCGCCCTTCGTCAACAGCAGGGAAGTTTGGTTTGAATTCCTTTCAAACCAGAGT      | 1800 |
|   | LM6  | GGCATGAACTCGAGAGTTTTGAGATCATTGATCGTCTCCTAGTCCAGCGCCCTTCGTCAACAGCAGGGAAGTTTGGTTTGAATTCCTTTCAAACCAGAGT      | 1800 |
|   | TN18 | CCAGAGGTGCGACTCCTCTCACCCCCAGCATCCAGACGACGCTGAGTTGAAAAAGGAGCTCAACCACACGGGCTTCCAGCCCGACGGGTGGCAGCGTA        | 1900 |
|   | LM6  | CCAGAGGTGCGACTCCTCTCACCCCCAGCATCCAGACGACGCTGAGTTGAAAAAGGAGCTCAACCACACGGGCTTCCAGCCCGACGGGTGGCAGCGTA        | 1900 |
|   | TN18 | CATGCAGCCCGCTGCCACGAATACACCTGCATGCTTGCACGGCAGCCCGCTCCTCCGGCCCAAACCTCCCTATAAGTAGAGAGCTTCTCTTCTCTGGCAAC     | 2000 |
|   | LM6  | CATGCAGCCCGCTGCCACGAATACACCTGCATGCTTGCACGGCAGCCCGCTCCTCCGGCCCAAACCTCCCTATAAGTAGAGAGCTTCTCTTCTCTGGCAAC     | 2000 |

Figure S4. Continued

|   |      |                                                                                                       |      |
|---|------|-------------------------------------------------------------------------------------------------------|------|
| C | TN18 | AAATCGGTTCTTTGAAATAAGTGAAATCAATGATTCATAAATAGTGTAGTGAAATCTTTTGCTTTGAAATGCTGTAATAATGTTGTCTTAAAAAAGTG    | 100  |
|   | LM6  | AAATCGGTTCTTTGAAATAAGTGAAATCAATGATTCATAAATAGTGTAGTGAAATCTTTTGCTTTGAAATGAGTAAATATGTTGTCTTAAAAAAGTG     | 100  |
|   | TN18 | AAACCGGTGTTTAAAAATGAATGATATATGTATTCTTATACTAGTGAAATCGGCTCTTCTGAAAAATGAGTGAAATTATTCTTGTGAATTACATGGAACA  | 200  |
|   | LM6  | AAACCGGTGTTTAAAAATGAATGATATATGTATTCTTATACTAGTGAAATCGGCTCTTCTGAAAAATGAGTGAAATTATTCTTGTGAATTACATGGAACA  | 200  |
|   | TN18 | CTTCTTTTGAAGTGGGTCAAAAACATGTTTCTGAAATGAAATCAGTGTTCTGAATATTGAAATGAAATCAGTGTTTTTAATTAATGAATGAAATCTATGT  | 300  |
|   | LM6  | CTTCTTTTGAAGTGGGTCAAAAACATGTTTCTGAAATGAAATCAGTGTTCTGAATATTGAAATGAAATCAGTGTTTTTAATTAATGAATGAAATCTATGT  | 300  |
|   | TN18 | TTTAAGAAATGAGTGAAATATGTGTCATTAAAGCTTTTAAATCATTCAAAATATATTCAAATCTGATCTTGTTTTAGCTATCTCGTCGCCCGGAATCCAA  | 400  |
|   | LM6  | TTTAAGAAATGAGTGAAATATGTGTCATTAAAGCTTTTAAATCATTCAAAATATATTCAAATCTGATCTTGTTTTAGCTATCTCGTCGCCCGGAATCCAA  | 400  |
|   | TN18 | TATTTAAAAAGATTTTGAATAATTTTTTATTCAAAGATATGAATGAATTAGTATTTTACAAGAAAAATGAAAAGCTAGTTTTCTTAATGGTGAGAG      | 500  |
|   | LM6  | TATTTAAAAAGATTTTGAATAATTTTTTATTCAAAGATATGAATGAATTAGTATTTTACAAGAAAAATGAAAAGCTAGTTTTCTTAATGGTGAGAG      | 500  |
|   | TN18 | AGAGAATATGCGTGCATGCAGCACTCCGTCCTTCTCTTCCTTTACCAGACGAAAACTACTATCATGGACTTATATCGGAGTGATTGCAATGTATTTCT    | 600  |
|   | LM6  | AGAGAATATGCGTGCATGCAGCACTCCGTCCTTCTCTTCCTTTACCAGACGAAAACTACTATCATGGACTTATATCGGAGTGATTGCAATGTATTTCT    | 600  |
|   | TN18 | GCAGCAAAAAATTGGTACCTTTTATCTGCAACTCAGCACACAACATCTTGACGCGGAGACGAAGGGCAAAGATGTGCCGGTAGGTACTGGTGCTGTTAG   | 700  |
|   | LM6  | GCAGCAAAAAATTGGTACCTTTTATCTGCAACTCAGCACACAACATCTTGACGCGGAGACGAAGGGCAAAGATGTGCCGGTAGGTACTGGTGCTGTTAG   | 700  |
|   | TN18 | AATTTCCCTTTTATGTCGATTGCTAGGTTTTTTAACGATCTCGTCACCCGGAATTCAAATATTTAAAAGGATTTTAGAATAATTTTTTATTCAAAGA     | 800  |
|   | LM6  | AATTTCCCTTTTATGTCGATTGCTAGGTTTTTTAACGATCTCGTCACCCGGAATTCAAATATTTAAAAGGATTTTAGAATAATTTTTTATTCAAAGA     | 800  |
|   | TN18 | TATCAATGAATTAATATTTTACAAGAAAAATGAAAAGCTAGTTTTTTCATGGTGGAGAGAGAGAGAGAGAGAGAGAGAGAGAGAGAGAGAGATGCTGTC   | 900  |
|   | LM6  | TATCAATGAATTAATATTTTACAAGAAAAATGAAAAGCTAGTTTTTTCATGGTGGAGAGAGAGAGAGAGAGAGAGAGAGAGAGAGAGAGAGATGCTGTC   | 900  |
|   | TN18 | ATGCAGCTCTCCGTCCTTCTCTACCATTACCACACGAAAACTACTACCACGGACTTCTATCGAGTGTATTGCAATGTATTTCTGCAGCAAAATATTTGG   | 1000 |
|   | LM6  | ATGCAGCTCTCCGTCCTTCTCTACCATTACCACACGAAAACTACTACCACGGACTTCTATCGAGTGTATTGCAATGTATTTCTGCAGCAAAATATTTGG   | 1000 |
|   | TN18 | TACCTTTATACTACAAGTCAGCAAAACAACTTGATGCGGAGACGAAGGGCAACAGATGTGCCGGGAGGTACTGGTGCTGTTAGAAGTTCCGCTTTGTAT   | 1100 |
|   | LM6  | TACCTTTATACTACAAGTCAGCAAAACAACTTGATGCGGAGACGAAGGGCAACAGATGTGCCGGGAGGTACTGGTGCTGTTAGAAGTTCCGCTTTGTAT   | 1100 |
|   | TN18 | GTGGAATTGTCGATTGCTAGGTCTGCACAAAAGTTGAAACTGGTAGGGCTGTACAAAAGTAGAAAAGTGCTTACGGTGGATAATGGATATATGGGACATGA | 1200 |
|   | LM6  | GTGGAATTGTCGATTGCTAGGTCTGCACAAAAGTTGAAACTGGTAGGGCTGTACAAAAGTAGAAAAGTGCTTACGGTGGATAATGGATATATGGGACATGA | 1200 |
|   | TN18 | CCATACGTGGTGCATGTAAGTGGCAGCATGAGCCATCATCTTTCTTCTCTCCTGCCTTTGTTCTTTTCCAATGAAGATTTGTCCCAACGAACCATA      | 1300 |
|   | LM6  | CCATACGTGGTGCATGTAAGTGGCAGCATGAGCCATCATCTTTCTTCTCTCCTGCCTTTGTTCTTTTCCAATGAAGATTTGTCCCAACGAACCATA      | 1300 |
|   | TN18 | TCATCATGGGTTGCTACTAACCAAGACCACATATGGAATATATGGGTTGCTACTAACCAAGACCACATGATTCCAATGTATCTTTATTGACACATAAAGA  | 1400 |
|   | LM6  | TCATCATGGGTTGCTACTAACCAAGACCACATATGGAATATATGGGTTGCTACTAACCAAGACCACATGATTCCAATGTATCTTTATTGACACATAAAGA  | 1400 |
|   | TN18 | ATATTGCTCGTGCCAACTTTTCCGGTAATGTGGACGTGGACGGCCAAATTAATAATCGGGCGATACCCGAACCTTGAGCACCAGCATGCGATCCAGTGCT  | 1500 |
|   | LM6  | ATATTGCTCGTGCCAACTTTTCCGGTAATGTGGACGTGGACGGCCAAATTAATAATCGGGCGATACCCGAACCTTGAGCACCAGCATGCGATCCAGTGCT  | 1500 |
|   | TN18 | TCTTCTCTGTGACCTTTTGATACAACACTATTTAGAATTAATAAATAATTTGGTCGTGGTATGGCAAGCACCAACGCTTGTGATGGATGCCTCAAGCGA   | 1600 |
|   | LM6  | TCTTCTCTGTGACCTTTTGATACAACACTATTTAGAATTAATAAATAATTTGGTCGTGGTATGGCAAGCACCAACGCTTGTGATGGATGCCTCAAGCGA   | 1600 |
|   | TN18 | AATTACTTTTGAGTATGCATCTGTGTCGACACGGCAGCAGCTTCCACCGACCTCCTAGGATACGTACCTTTGCCTTTTATGGGAGTGAGATTCATC      | 1700 |
|   | LM6  | AATTACTTTTGAGTATGCATCTGTGTCGACACGGCAGCAGCTTCCACCGACCTCCTAGGATACGTACCTTTGCCTTTTATGGGAGTGAGATTCATC      | 1700 |
|   | TN18 | ACCACGTGATGTGTAGTGTAGGGTCACAACGGGAAAAAGATGCCGGAAATGTGGTTTTTTTCCATGGGCTGATCGTTGTGTAAAGTTGATTTTCTCCTCA  | 1800 |
|   | LM6  | ACCACGTGATGTGTAGTGTAGGGTCACAACGGGAAAAAGATGCCGGAAATGTGGTTTTTTTCCATGGGCTGATCGTTGTGTAAAGTTGATTTTCTCCTCA  | 1800 |
|   | TN18 | GCTAGCCATGAGTGTACATGGGTGGTGGCAGGCCGTCAGTCATTCCGGCTCGGCATCGGATCCCTATCCATTGGCGGGCTTATAAACGGCTACTGAG     | 1900 |
|   | LM6  | GCTAGCCATGAGTGTACATGGGTGGTGGCAGGCCGTCAGTCATTCCGGCTCGGCATCGGATCCCTATCCATTGGCGGGCTTATAAACGGCTACTGAG     | 1900 |
|   | TN18 | GAGCCCCATTTGTGCAAAACGGTGCTTCCATCTCAGATCACGAGCAACCTTATCAAGAAAGAAGAGCAGCAGAGCCGTGTTTAACTACTCGTAAAGGACCA | 2000 |
|   | LM6  | GAGCCCCATTTGTGCAAAACGGTGCTTCCATCTCAGATCACGAGCAACCTTATCAAGAAAGAAGAGCAGCAGAGCCGTGTTTAACTACTCGTAAAGGACCA | 2000 |

Figure S4. Continued

D

|      |                                                                                                       |      |
|------|-------------------------------------------------------------------------------------------------------|------|
| TN18 | CTAATTTGCATTGCTTTTGTGCATAACCATGTTTTTTCCTGAAGCTACTTATGCAGCGAGGGTACAGGTTGTTCTAGATGGCTCTGTAGACAGTGAGA    | 100  |
| LM6  | CTAATTTGCATTGCTTTTGTGCATAACCATGTTTTTTCCTGAAGCTACTTATGCAGCGAGGGTACAGGTTGTTCTAGATGGCTCTGTAGACAGTGAGA    | 100  |
| TN18 | ATGAGGAGACTCAAACCATGAAGATTCTAATGAGGAAATCGATTATGATAAATAACAACACAGGTAATCTTTCAGACAGACACACCAAAAAAATAGTT    | 200  |
| LM6  | ATGAGGAGACTCAAACCATGAAGATTCTAATGAGGAAATCGATTATGATAAATAACAACACAGGTAATCTTTCAGACAGACACACCAAAAAAATAGTT    | 200  |
| TN18 | CGGTCTTAATTCTACTTCCAAAATGTAAAGTAAATTCAGAGACACATAACACAGAGTCCTTTGTGCTAACTTTCTAATTAACCGCTCCAAAATAT       | 300  |
| LM6  | CGGTCTTAATTCTACTTCCAAAATGTAAAGTAAATTCAGAGACACATAACACAGAGTCCTTTGTGCTAACTTTCTAATTAACCGCTCCAAAATAT       | 300  |
| TN18 | GTACTCGCCACAAATAAACTTTCTAATTCGCTAGTCTTCATCTTTGACTCACTACAAATAAATCTATGAAAATAGATCTCTGCTAAAAATCCTGCAAAA   | 400  |
| LM6  | GTACTCGCCACAAATAAACTTTCTAATTCGCTAGTCTTCATCTTTGACTCACTACAAATAAATCTATGAAAATAGATCTCTGCTAAAAATCCTGCAAAA   | 400  |
| TN18 | TTCCCATAAAAATTTCAATAAAATCTAAGAAGTCTTCATCTTTGAAAACTACCACGATGTCATAGGTTAAAAATCCAATCACTTCATCATTTGGTCCAAT  | 500  |
| LM6  | TTCCCATAAAAATTTCAATAAAATCTAAGAAGTCTTCATCTTTGAAAACTACCACGATGTCATAGGTTAAAAATCCAATCACTTCATCATTTGGTCCAAT  | 500  |
| TN18 | TAATTTTTTATAACAAAAGTTGTTCAATTTGTGACTAAGAAAGTGGTTGAATTTTAGAGTGGTAATATGGTATACCTCGGATAGGTTGGTCTATGATAAC  | 600  |
| LM6  | TAATTTTTTATAACAAAAGTTGTTCAATTTGTGACTAAGAAAGTGGTTGAATTTTAGAGTGGTAATATGGTATACCTCGGATAGGTTGGTCTATGATAAC  | 600  |
| TN18 | CGGAGGTGGAGTGGATCAGCATCTAATGTGAGGCACTCACTGACGGTCTGTCCGTGGTGTGGGTATGCGTCCGCGCCTAGGGATCAGTCCGAATAG      | 700  |
| LM6  | CGGAGGTGGAGTGGATCAGCATCTAATGTGAGGCACTCACTGACGGTCTGTCCGTGGTGTGGGTATGCGTCCGCGCCTAGGGATCAGTCCGAATAG      | 700  |
| TN18 | CAGAGTTCGTCGGTGTGGCTAGCAACGTCAAGACTTTAAAAAGATTATCATCAATTGTGCACTACATATCTGATCTTGACAGTGAATATGAACATGAC    | 800  |
| LM6  | CAGAGTTCGTCGGTGTGGCTAGCAACGTCAAGACTTTAAAAAGATTATCATCAATTGTGCACTACATATCTGATCTTGACAGTGAATATGAACATGAC    | 800  |
| TN18 | TCATGTTTAATACAGCGAACAATAATCAAAATAGAAATGGTGGTGTGTTTGGCTGGAGGGGACGGTAATTCAGGGAGGGGTAGGGAGGGTGGATTATG    | 900  |
| LM6  | TCATGTTTAATACAGCGAACAATAATCAAAATAGAAATGGTGGTGTGTTTGGCTGGAGGGGACGGTAATTCAGGGAGGGGTAGGGAGGGTGGATTATG    | 900  |
| TN18 | AGTTTGAGGGTTGAAGTCCCATCATTTTAGAAAGTTCAATATACATCGACACTTCATGATGATTCATCATAGGATGCATTTCAAGATACAAATCAGTCAC  | 1000 |
| LM6  | AGTTTGAGGGTTGAAGTCCCATCATTTTAGAAAGTTCAATATACATCGACACTTCATGATGATTCATCATAGGATGCATTTCAAGATACAAATCAGTCAC  | 1000 |
| TN18 | TCATAGTTTTTGTCTGTCTTACCAACATGAAAGTAAACTAAAACCAAGATTTACATGCCTAATCCCACCATGATGTCACCCCTGTCCAGTTGATGC      | 1100 |
| LM6  | TCATAGTTTTTGTCTGTCTTACCAACATGAAAGTAAACTAAAACCAAGATTTACATGCCTAATCCCACCATGATGTCACCCCTGTCCAGTTGATGC      | 1100 |
| TN18 | CCAAGCCAAATAATCCAGGGAAGATATGTAGAACAATGTAATGTATGACCAGAGAACCAAACTACTGAGATCAATACAGTGAGAAAACTAAGTTTTTGAA  | 1200 |
| LM6  | CCAAGCCAAATAATCCAGGGAAGATATGTAGAACAATGTAATGTATGACCAGAGAACCAAACTACTGAGATCAATACAGTGAGAAAACTAAGTTTTTGAA  | 1200 |
| TN18 | AAGTAGTCAATGATAAAAAAATTTGTAGAACTTCATCAGTTGACACCATAACAAGTAAAAACACAGAAGACATGTGACTGCTAATTACTCAATAGATGTA  | 1300 |
| LM6  | AAGTAGTCAATGATAAAAAAATTTGTAGAACTTCATCAGTTGACACCATAACAAGTAAAAACACAGAAGACATGTGACTGCTAATTACTCAATAGATGTA  | 1300 |
| TN18 | GATCAAGGTCCCTCTATAATACCTGCAATGTTAGGAGTCATCTAAGCCCAACAGGCATCATGCCTTCTCATTATCCAACCAGAAACCTCCTCTAAGAA    | 1400 |
| LM6  | GATCAAGGTCCCTCTATAATACCTGCAATGTTAGGAGTCATCTAAGCCCAACAGGCATCATGCCTTCTCATTATCCAACCAGAAACCTCCTCTAAGAA    | 1400 |
| TN18 | GGCAGCACCTTGCCCAACGGTGGCACATTTTTCCTCGGGCATGCCATGTTGGCATGAGAAATAATCTCAAGAGCATCCCATTAAACCAAAATGTTACC    | 1500 |
| LM6  | GGCAGCACCTTGCCCAACGGTGGCACATTTTTCCTCGGGCATGCCATGTTGGCATGAGAAATAATCTCAAGAGCATCCCATTAAACCAAAATGTTACC    | 1500 |
| TN18 | ATTCCAGATTACTCAACACGTTGAATAATCTCATGCCATGCAGCTAGTTGTATCCTATGCGGACATGCGTGTCTGTTAAATTAGAATTATCATCACAATAA | 1600 |
| LM6  | ATTCCAGATTACTCAACACGTTGAATAATCTCATGCCATGCAGCTAGTTGTATCCTATGCGGACATGCGTGTCTGTTAAATTAGAATTATCATCACAATAA | 1600 |
| TN18 | CAGAAATGCAAAGCGGAGAAAGCACATATGTTGGTGTACCGGTAAGCAGCCAATTAGTACAAGCTTCCACATTATGCAAAATTGCACTACAAAGATATTA  | 1700 |
| LM6  | CAGAAATGCAAAGCGGAGAAAGCACATATGTTGGTGTACCGGTAAGCAGCCAATTAGTACAAGCTTCCACATTATGCAAAATTGCACTACAAAGATATTA  | 1700 |
| TN18 | TTACCGATATGCGATATTCTATTACATGTAGAAGTAGATTGCATCGTCATAGAAAGTATAGAAAATTTCAATGCTTACAGACTTACCTTCCCATTATT    | 1800 |
| LM6  | TTACCGATATGCGATATTCTATTACATGTAGAAGTAGATTGCATCGTCATAGAAAGTATAGAAAATTTCAATGCTTACAGACTTACCTTCCCATTATT    | 1800 |
| TN18 | CTTTCTCAGATTAGCAGAGATGAATCGGCTTCCACCGGATCCTTAGCTGGTGTAGCCTCAACTGCTTGCTCAGGACGATTGCTTAGCATGACGTGCAGCC  | 1900 |
| LM6  | CTTTCTCAGATTAGCAGAGATGAATCGGCTTCCACCGGATCCTTAGCTGGTGTAGCCTCAACTGCTTGCTCAGGACGATTGCTTAGCATGACGTGCAGCC  | 1900 |
| TN18 | TCCCGCGGTAGTAGTTCAAATCCTGCACAATGACACAAAAGGCATAGACCGTCAGAACACAGTCCAATGGTTTCTAGACCTGGCGTACATCGGCGCCTCC  | 2000 |
| LM6  | TCCCGCGGTAGTAGTTCAAATCCTGCACAATGACACAAAAGGCATAGACCGTCAGAACACAGTCCAATGGTTTCTAGACCTGGCGTACATCGGCGCCTCC  | 2000 |

Figure S4. Continued
